# Supplementary material for: Effect of a digital blood pressure coach on hypertension management in primary care practices—a pragmatic, randomised controlled trial
Source: Frontiers journal article supplement (doi:10.3389/fdgth.2025.1516600), 2025-03-07
Supplement: Data_Sheet_1.pdf [file Data_Sheet_1.pdf]

## ***Supplementary Material***

### **Effect of a digital blood pressure coach on hypertension management in primary care practices - a pragmatic, randomised controlled trial**

Christian BEGER<sup>a,b</sup>, Dominik RÜEGGER<sup>c</sup>, Anna LENZ<sup>c</sup>, Steffen WAGNER<sup>d</sup>, Kai Martin SCHMIDT-OTT<sup>b</sup>, Dirk VOLLAND<sup>c</sup>, Florian P. LIMBOURG<sup>a,b</sup>

<sup>a</sup>Vascular Medicine Research, Dept. of Nephrology and Hypertension, Hannover Medical School, Hannover, Germany

<sup>b</sup>Department of Nephrology and Hypertension, Hannover Medical School, Hannover, Germany

<sup>c</sup>Pathmate Technologies GmbH, Mannheim, Germany

<sup>d</sup>Department II (Mathematics, Physics and Chemistry), Berliner Hochschule für Technik, Berlin, Germany.

TABLE S1. Inclusion and Exclusion criteria

| Inclusion criteria                                                                                                                                                                                                                                              |
|-----------------------------------------------------------------------------------------------------------------------------------------------------------------------------------------------------------------------------------------------------------------|
| <ul style="list-style-type: none"><li>- Minimum age of 18 years</li><li>- Diagnosis of hypertension (ICD 10: I10)</li><li>- Sufficient knowledge of German</li><li>- Existing E-Mail address</li><li>- Internet access</li><li>- Smartphone ownership</li></ul> |
| Exclusion criteria                                                                                                                                                                                                                                              |
| <ul style="list-style-type: none"><li>- Severe (uncorrectable) visual impairment that may hinder the use of the app</li><li>- Pregnancy</li></ul>                                                                                                               |

---

TABLE S2. Trial Outcomes

| Primary outcome                                                                                                                                                                            |
|--------------------------------------------------------------------------------------------------------------------------------------------------------------------------------------------|
| Between group difference (control vs. intervention group) in office SBP from time t0 to time t1 (routine examination after 90–150 days) in participants with uncontrolled hypertension.    |
| Secondary outcomes                                                                                                                                                                         |
| 1. Between group difference (control vs. intervention group) in office SBP from time t0 to time t1 (routine examination after 90–150 days) in all participants.                            |
| 2. Between group difference (control vs. intervention group) in office DBP from time t0 to time t1 (routine examination after 90–150 days) in participants with uncontrolled hypertension. |
| 3. Between group difference (control vs. intervention group) in office DBP from time t0 to time t1 (routine examination after 90–150 days) in all participants.                            |
| 4. Between group difference (control vs. intervention group) in oSBP-control rate from time t0 to time t1 (routine examination after 90–150 days) in all participants.                     |
| 5. Between group difference (control vs. intervention group) in oDBP-control rate from time t0 to time t1 (routine examination after 90–150 days) in all participants.                     |
| 6. Difference in the proportion of patients in the IG and CG with a valid blood pressure diary.                                                                                            |

---

Time t0= baseline, time t1= after 90–150 days.

TABLE S3. Change in blood pressure and BP-control in participants with uncontrolled diastolic hypertension

|                        | Coaching app - Intervention (n=162) |           |            | Standard care - Control (n=147) |           |            | Effect-size |           |            |     |
|------------------------|-------------------------------------|-----------|------------|---------------------------------|-----------|------------|-------------|-----------|------------|-----|
|                        | Baseline                            | Follow up | Change     | Baseline                        | Follow up | Change     |             | Statistic | 95% CI     | P   |
| Office DBP (SD)        | 96.3±10.4                           | 85.0±9.3  | -11.3±14.4 | 95.7±6.5                        | 84.6±8.6  | -11.1±10.5 | -0.20       | t=0.1     | -3.42-3.02 | .9  |
| Office DBP control (%) | 0                                   | 61.3      | 61.3       | 0                               | 67        | 67         | 0.78<br>OR  | Z=0.9     | 0.46-1.33  | .36 |

Data for participants with uncontrolled diastolic hypertension ( $\geq 90$ mmHg). OBP was measured at baseline and after  $120 \pm 14$  days. Office DBP control: office DBP<90 mm Hg. OBP: Office blood pressure, DBP: diastolic BP, OR: odds ratio.

TABLE S4. Analysis of change in blood pressure control in various subgroups

|                           | Coaching app - Intervention |          |           |        | Standard care - Control |          |           |        | Effect-size | Statistic | 95% CI    | P   |
|---------------------------|-----------------------------|----------|-----------|--------|-------------------------|----------|-----------|--------|-------------|-----------|-----------|-----|
|                           | n                           | Baseline | Follow up | Change | n                       | Baseline | Follow up | Change |             |           |           |     |
| Female                    | 106                         | 39.6     | 57.5      | 17.9   | 107                     | 33.6     | 57.9      | 24.3   | 0.71        | z=-0.8    | 0.30-1.71 | .45 |
| Male                      | 153                         | 26.1     | 52.3      | 26.1   | 142                     | 32.4     | 50.7      | 18.3   | 1.57        | z=1.2     | 0.73-3.38 | .25 |
| Age <60y                  | 156                         | 31.4     | 55.8      | 24.4   | 142                     | 28.2     | 50.7      | 22.5   | 1.07        | z=0.2     | 0.51-2.25 | .86 |
| Age ≥60y                  | 103                         | 32.0     | 52.4      | 20.4   | 107                     | 39.3     | 57.9      | 18.7   | 1.13        | z=0.3     | 0.46-2.80 | .79 |
| BMI <30kg/m <sup>2</sup>  | 155                         | 31.6     | 50.3      | 18.7   | 142                     | 34.5     | 57.7      | 23.2   | 0.79        | z=-0.6    | 0.36-1.73 | .56 |
| BMI ≥30 kg/m <sup>2</sup> | 104                         | 31.7     | 60.6      | 28.8   | 107                     | 30.8     | 48.6      | 17.8   | 1.66        | z=1.2     | 0.71-3.91 | .24 |
| BP controlled             | 82                          | 100.0    | 75.6      | -24.4  | 82                      | 100.0    | 69.5      | -30.5  | 1.36        | z=0.9     | 0.68-2.71 | .38 |
| BP uncontrolled           | 177                         | 0        | 44.6      | 44.6   | 167                     | 0        | 46.1      | 46.1   | 0.94        | z=-0.3    | 0.62-1.44 | .76 |

OBP was measured at baseline and after 120 ± 14 days. Controlled OBP: oSBP < 140 mm Hg and office DBP < 90 mm Hg. OBP: Office blood pressure

TABLE S5. Change in Defined Daily Dose (DDD)

|                  | Coaching app - Intervention |              |             |              | Standard care - Control |              |               |                |
|------------------|-----------------------------|--------------|-------------|--------------|-------------------------|--------------|---------------|----------------|
|                  | n                           | Baseline     | Follow up   | Change       | n                       | Baseline     | Follow up     | Change         |
| DDD mean (SD)    | 258                         | 2.6 (1.9)    | 2.8 (2.0)   | 0.2 (1.1)    | 245                     | 2.6 (2.1)    | 2.6 (2.0)     | 0.0 (1.2)      |
| DDD median (IQR) | 258                         | 2.0 (0-10.9) | 2.1 (0-8.7) | 0.0 (-4.5-5) | 245                     | 2.0 (0-10.2) | 2.0 (0.-11.4) | 0.0 (-5.8-5.0) |

DDD: Defined daily dose, SD: standard deviation, IQR: interquartile range.

TABLE S6. Characteristics of participants and excluded individuals at baseline

| Characteristics                 | Participants, n (%)        |                   |                        |                   |
|---------------------------------|----------------------------|-------------------|------------------------|-------------------|
|                                 | Intervention: Coaching App |                   | Control: Standard care |                   |
|                                 | Participants (n=259)       | Excluded (n=42)   | Participants (n=249)   | Excluded (n=55)   |
| Age, years                      | 55.9±12.9                  | 55.4±16.1         | 55.5±13.8              | 50.1±15.4 (n=53)  |
| Female (%)                      | 106 (40.9)                 | 16 (40, n=40)     | 107 (43.0)             | 21 (40.4, n=50)   |
| Body mass index                 | 29.2±5.2                   | 28.3±5.6          | 30.3±9.3               | 31.2±8.6          |
| Office SBP, mmHg                | 142.7±17.9                 | 145.9±15.5 (n=41) | 142.3±17.3             | 140.7±19.0 (n=54) |
| Office DBP, mmHg                | 87.5±11.8                  | 88.3±11.2 (n=41)  | 86.7±10.5              | 87.2±10.6 (n=54)  |
| Office BP controlled (%)        | 82 (31.7)                  | 9 (21.9, n=41)    | 82 (32.9)              | 20 (37.0, n=54)   |
| Antihypertensive medication (%) | 235 (90.7)                 | 34 (80.9)         | 220 (88.4)             | 45 (83.3, n=54)   |
| Defined daily dose              | 2.6±1.9                    | 2.5±2.2           | 2.6±2.1                | 2.4±2.1 (n=47)    |

Characteristics of all participants. Variables expressed as number and percentage. Age, Body mass index, office systolic and diastolic BP values, antihypertensive agents and defined daily doses are expressed as mean ± SD. Controlled office BP: systolic BP < 140 mm Hg and diastolic BP < 90 mm Hg. Due to incomplete data for the excluded participants, the n number varies.
